# Supplementary material
Source: Research Square preprint supplement (doi:10.21203/rs.3.rs-8511874/v1)
Supplement: Supplementary file 1 [file 208d46ed750f9aafcdd7e730.docx]

**Supplementary Data**

**Table 8*:*** Random index matrix of the same dimension.

| n* | 2 | 3 | 4 | 5 | 6 | 7 | 8 | 9** | 10 |
| --- | --- | --- | --- | --- | --- | --- | --- | --- | --- |
| RI | 0.00 | 0.54 | 0.93 | 1.14 | 1.24 | 1.32 | 1.41 | 1.45 | 1.51 |

n* =10, is the number of parameters and RI represent the inconsistency values.

** Random Index (RI) used for calculating CR, n=9=1.45

**Table 9*:*** Weights of the criteria assignment and synthesized matrix for LULC drivers of change using Analytical Hierarchy Process (AHP) and Saaty’s method.

| **Category/Drivers** | **AE** | **PS** | **LG** | **MA** | **IE** | **ST** | **DS** | **EL** | **WL** |
| --- | --- | --- | --- | --- | --- | --- | --- | --- | --- |
| **AE** | 1 | 2 | 3 | 4 | 5 | 6 | 7 | 8 | 9 |
| **PS** | 0.500 | 1 | 2 | 3 | 4 | 5 | 6 | 7 | 8 |
| **LG** | 0.167 | 0.500 | 1 | 2 | 3 | 4 | 5 | 6 | 7 |
| **MA** | 0.125 | 0.333 | 0.500 | 1 | 2 | 3 | 4 | 5 | 6 |
| **IE** | 0.100 | 0.200 | 0.333 | 0.500 | 1 | 2 | 3 | 4 | 5 |
| **ST** | 0.083 | 0.167 | 0.25 | 0.333 | 0.500 | 1 | 2 | 3 | 4 |
| **DS** | 0.071 | 0.167 | 0.2 | 0.25 | 0.333 | 0.500 | 1 | 2 | 3 |
| **EL** | 0.063 | 0.143 | 0.167 | 0.2 | 0.25 | 0.333 | 0.500 | 1 | 2 |
| **WL** | 0.056 | 0.125 | 0.143 | 0.167 | 0.2 | 0.25 | 0.333 | 0.500 | 1 |
| **Sum (a)** | **2.164** | **4.635** | **7.593** | **11.450** | **16.283** | **22.083** | **28.833** | **36.500** | **45.000** |

**Table 10:** Normalized pair-wise matrix of potential drivers of LULC of changes

| **Category**  **/Drivers** | **AE** | **PS** | **LG** | **MA** | **IE** | **ST** | **DS** | **EL** | **WL** | **Priority Weight (b)** |
| --- | --- | --- | --- | --- | --- | --- | --- | --- | --- | --- |
| **AE** | 0.462 | 0.431 | 0.395 | 0.349 | 0.307 | 0.272 | 0.243 | 0.219 | 0.200 | 0.320 |
| **PS** | 0.231 | 0.216 | 0.263 | 0.262 | 0.246 | 0.226 | 0.208 | 0.192 | 0.178 | 0.225 |
| **LG** | 0.077 | 0.108 | 0.132 | 0.175 | 0.184 | 0.181 | 0.173 | 0.164 | 0.156 | 0.150 |
| **MA** | 0.058 | 0.072 | 0.066 | 0.087 | 0.123 | 0.136 | 0.139 | 0.137 | 0.133 | 0.106 |
| **IE** | 0.046 | 0.043 | 0.044 | 0.044 | 0.061 | 0.091 | 0.104 | 0.110 | 0.111 | 0.073 |
| **ST** | 0.038 | 0.036 | 0.033 | 0.029 | 0.031 | 0.045 | 0.069 | 0.082 | 0.089 | 0.050 |
| **DS** | 0.033 | 0.036 | 0.026 | 0.022 | 0.020 | 0.023 | 0.035 | 0.055 | 0.067 | 0.035 |
| **EL** | 0.029 | 0.031 | 0.022 | 0.017 | 0.015 | 0.015 | 0.017 | 0.027 | 0.044 | 0.024 |
| **WL** | 0.026 | 0.027 | 0.019 | 0.015 | 0.012 | 0.011 | 0.012 | 0.014 | 0.022 | 0.017 |
|  |  |  |  |  |  |  |  |  |  | ∑=1 |

***Note: AE*** *is agriculture expansion;* ***PS*** *is population pressure;* ***LG*** *is logging;* ***MA*** *is mining activities;* ***IE*** *is industrial expansion;* ***DS*** *is distance from settlement;* ***E*** *is elevation;* ***ST*** *is soil type, and* ***WL*** *is weak laws. Each value of the pairwise matrix table was divided by the summation value of its respective column as shown in Tables 6.* ***(a)*** *and* ***(b)*** *in Tables 7 and 8 are the pairwise relative weight and priority weight for each potential driver factor of LULC change.*

**Table 11:** Classification of HAILS values for all buffer zones across all sampling locations.

| Sampling Code | Sampling Location | HAILS at 50m | HAILS at 100m | HAILS at 300m | HAILS at 600m | HAILS at 900m | HAILS at 1200m | Total HAILS |
| --- | --- | --- | --- | --- | --- | --- | --- | --- |
| UA 1 | Diaso | 0.83 | 0.79 | 0.63 | 0.49 | 0.43 | 0.31 | 0.58 |
| UA 2 | Ankwaoso | 0.79 | 0.71 | 0.66 | 0.44 | 0.41 | 0.28 | 0.55 |
| UA 3 | Aiyim | 0.75 | 0.75 | 0.69 | 0.55 | 0.52 | 0.26 | 0.59 |
| UA 4 | Nzema Jukwa | 0.85 | 0.70 | 0.63 | 0.46 | 0.47 | 0.38 | 0.58 |
| UA 5 | Nsuaem | 0.84 | 0.55 | 0.52 | 0.50 | 0.42 | 0.32 | 0.53 |
| MA 6 | Hiawa | 0.83 | 0.51 | 0.52 | 0.52 | 0.46 | 0.28 | 0.52 |
| MA 7 | Bonsaso | 0.84 | 0.69 | 0.62 | 0.54 | 0.45 | 0.35 | 0.58 |
| MA 8 | Tarkwa | 0.80 | 0.75 | 0.63 | 0.54 | 0.42 | 0.33 | 0.58 |
| MA 9 | Heman | 0.74 | 0.72 | 0.64 | 0.48 | 0.38 | 0.38 | 0.56 |
| MA 10 | Prestea | 0.84 | 0.79 | 0.58 | 0.57 | 0.47 | 0.46 | 0.62 |
| LA 11 | Dominase | 0.80 | 0.76 | 0.67 | 0.53 | 0.41 | 0.35 | 0.59 |
| LA 12 | Dompim | 0.76 | 0.64 | 0.63 | 0.50 | 0.41 | 0.33 | 0.55 |
| LA 13 | Gwira Banso | 0.81 | 0.81 | 0.66 | 0.42 | 0.46 | 0.36 | 0.59 |
| LA 14 | Kokofri | 0.73 | 0.73 | 0.52 | 0.51 | 0.44 | 0.32 | 0.54 |
| LA 15 | Atababo | 0.73 | 0.70 | 0.58 | 0.44 | 0.52 | 0.35 | 0.55 |
| EA 16 | Sawoma | 0.82 | 0.53 | 0.63 | 0.53 | 0.48 | 0.32 | 0.55 |
| EA 17 | Asanta | 0.72 | 0.60 | 0.50 | 0.43 | 0.30 | 0.29 | 0.47 |
| EA 18 | Ankobra | 0.68 | 0.61 | 0.58 | 0.47 | 0.50 | 0.32 | 0.53 |
| SA 19 | Beach | 0.62 | 0.55 | 0.51 | 0.45 | 0.47 | 0.30 | 0.48 |
| SA 20 | 50m | 0.60 | 0.52 | 0.46 | 0.38 | 0.33 | 0.28 | 0.43 |
| SA 21 | 100m | 0.54 | 0.46 | 0.44 | 0.35 | 0.37 | 0.23 | 0.40 |
| SA 22 | 150m | 0.47 | 0.37 | 0.35 | 0.32 | 0.20 | 0.22 | 0.32 |
| SA 23 | 200m | 0.34 | 0.33 | 0.34 | 0.30 | 0.23 | 0.23 | 0.29 |

***Note: UA*** *is Upper Ankobra;* ***MA*** *is Middle Ankobra;* ***LA*** *is Lower Ankobra;* ***EA*** *is Estuarine Ankobra;* ***SA*** *is Sea/Marine Areas of the Ankobra*.

Source: HAILS Analysis, 2023.
